# Supplementary material
Source: PubMed Central journal article supplement (PMC3074979)
Supplement: NIHMS251229-supplement-1.pdf [file NIHMS251229-supplement-1.pdf]

Figure S1

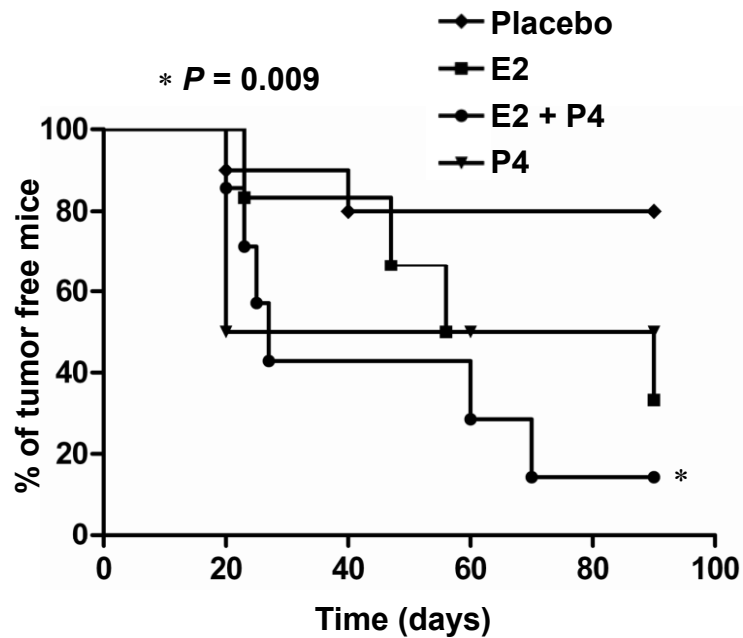

**Legend to Supplementary Figure 1:**

Two ER+/PR- mammary tumors from *Neu+Tip30<sup>-/-</sup>* mice were minced and inoculated s.c. in the front flanks of ovariectomized mice supplemented with Placebo (n = 10), estrogen (E2, n = 6), progesterone (P4, n = 6) or E2 plus P4 (n = 7) pellets. Kaplan-Meier analysis of mammary-tumor free-survival was performed based on the time of tumors becoming 1 cm<sup>3</sup> in volume or tumors becoming  $\geq 0.25$  cm<sup>3</sup> by the end of three months.  $P = 0.009$  (placebo vs. E2 + P4), log-rank test.

Figure S2

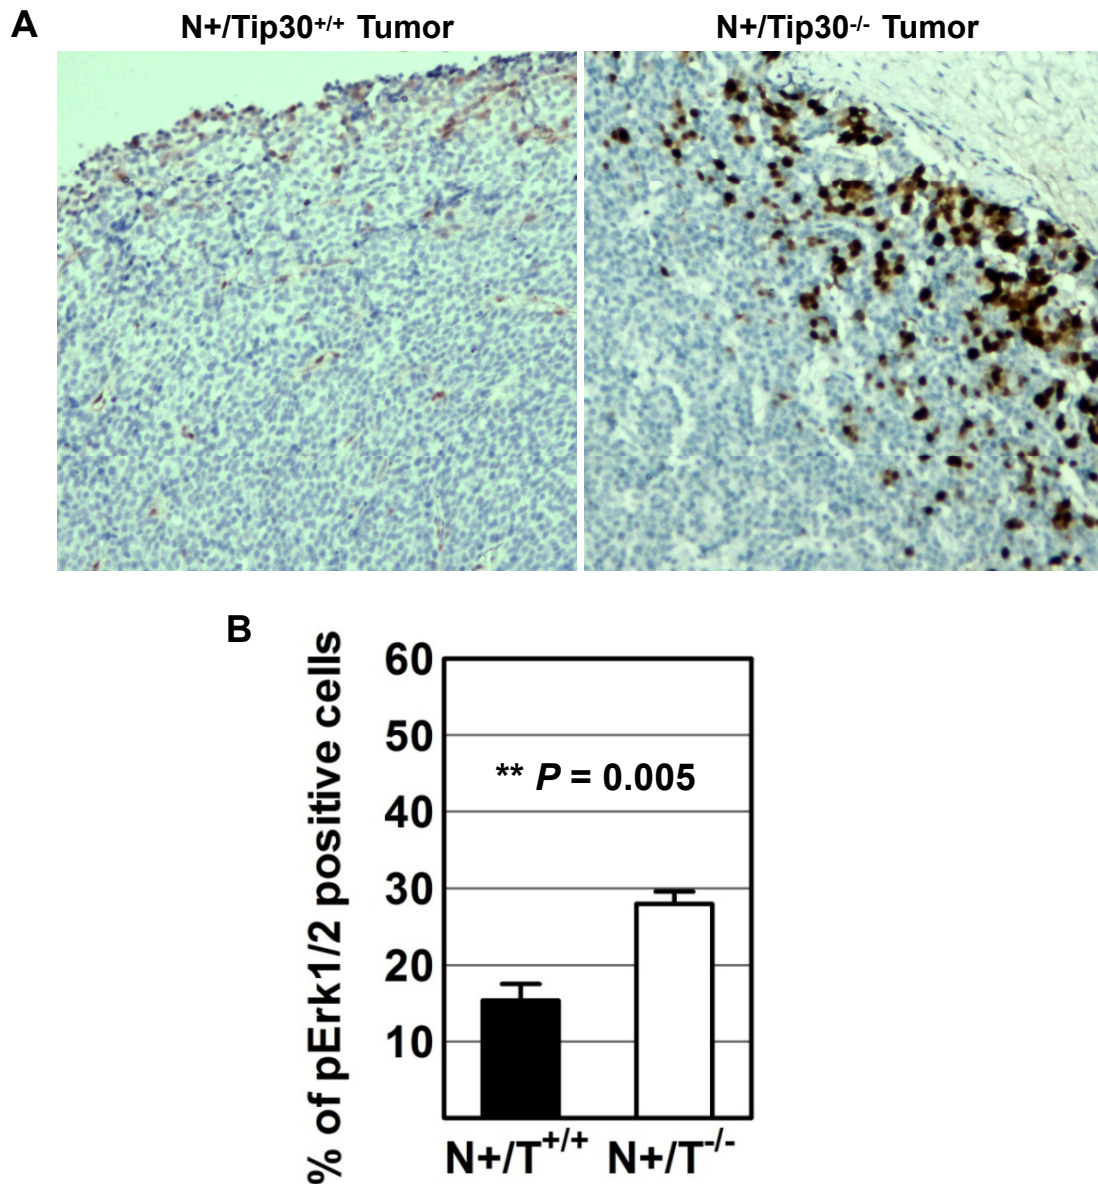

**Legend to Supplementary Figure 2:**

**(A)** Representative immunohistochemical staining images show enhanced phosphorylation of ERK1/2 at Thr202/Tyr204 in mammary tumors from Neu+/Tip30<sup>-/-</sup> mice (n = 3) compared with those from Neu+/Tip30<sup>+/+</sup> mice (n = 3).

**(B)** Quantification of pERK1/2 positive cells. Since very few cells at the tumor core were stained positive for pERK, cells within 120  $\mu$ m distance from the edge were counted.  $P = 0.005$ ; t test.
